# Supplementary material for: Dual Responsive Dependent Background Color Based on Thermochromic 1D Photonic Crystal Multilayer Films
Source: MDPI journal article supplement (doi:10.3390/polym14235330), 2022-12-06
Supplement: s1 [file s1]

# **Dual responsive dependent background color based on thermochromic 1D photonic crystal multilayer films**

*Yejin Kim, Seo Hyun Kim, Henok Getachew Girma, Seungju Jeon, Bogyu Lim\* and Seo-Hyun Jung\**

Center for Advanced Specialty Chemicals, Korea Research Institute of Chemical Technology (KRICT), Ulsan, 44412, Republic of Korea

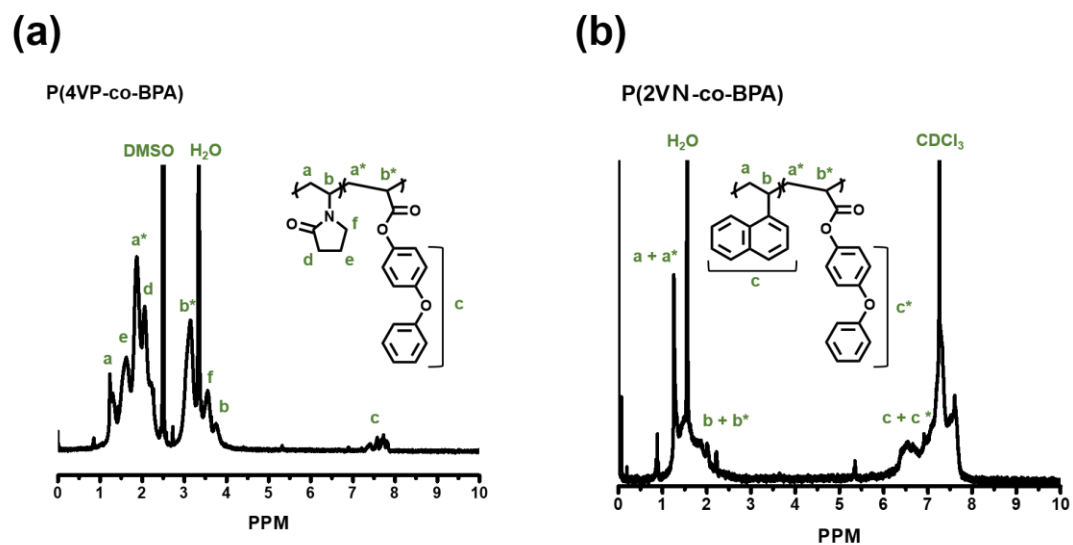

**Figure S1.** <sup>1</sup>H NMR spectra of (a) P(4VP-co-BPA) and (b) P(2VN-co-BPA)

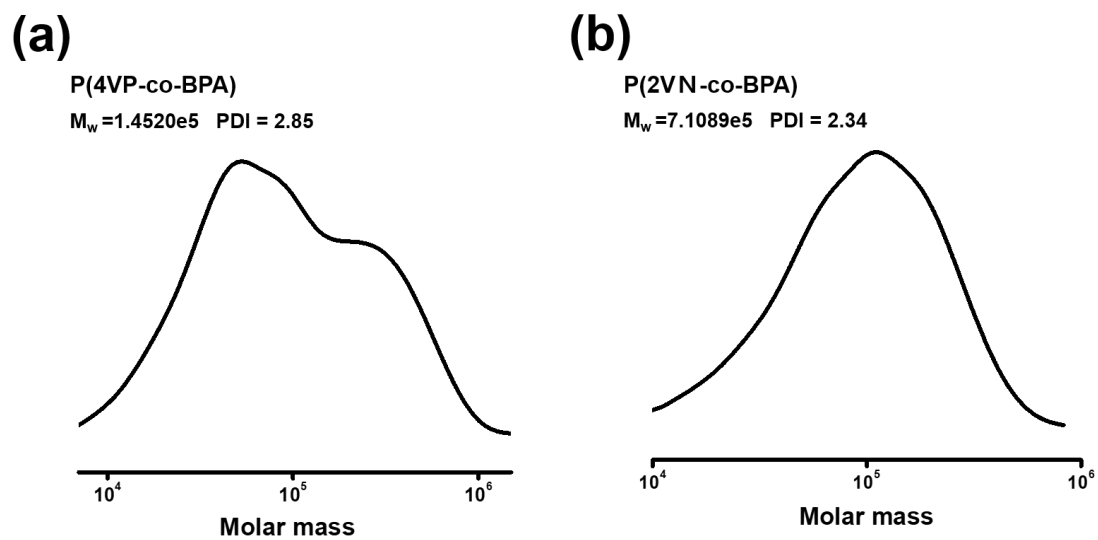

**Figure S2.** GPC traces of (a) P(4VP-co-BPA) and (b) P(2VN-co-BPA)
